# Supplementary material for: Chemical Composition, Antioxidant and Anticancer Activity of Pericarp Water Extracts of Mediterranean Ancient Chestnut Accessions
Source: Preprints.org preprint supplement (doi:10.20944/preprints202310.1403.v1), 2023-10-23
Supplement: Supplementary file 1 [file supplementary]

# **Chemical composition and anticancer activity of pericarp water extracts of Mediterranean ancient chestnut accessions**

Ylenia Spissu <sup>1#</sup>, Maria Giovanna Molinu <sup>1#\*</sup>, Guy D'hallewin <sup>1\*</sup>, Giulia Sanna <sup>1</sup>, Gavina Serra <sup>1</sup>, Antonella Muroi <sup>2</sup> and Antonio Barberis <sup>1</sup>

## **Supplementary materials**

Figure S1: cyclic voltammograms of growing concentration of gallic acid (a) and relative calibration curve (b);

Figure S2: Chromatographic profile of ILDP pericarp cold (A) and hot (B) water extracts.

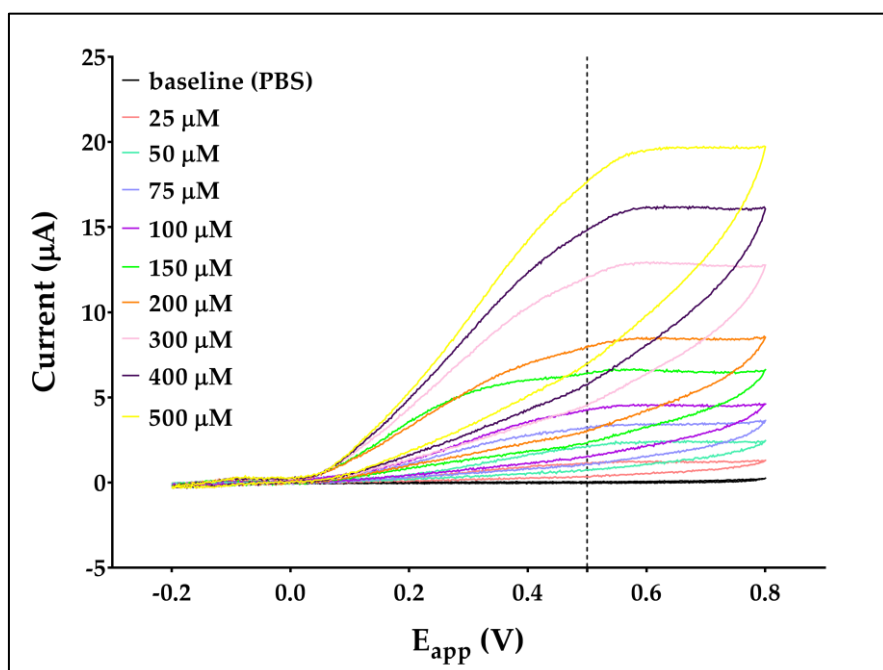

**Figure S1a.** Cyclic voltammograms of growing concentration (from 25 to 500  $\mu\text{M}$ ) of gallic acid. CVs were carried out, with a scanned potential range ( $E_{\text{app}}$ ) comprised between -0.2 V and +0.8 V vs. carbon pseudoreference.

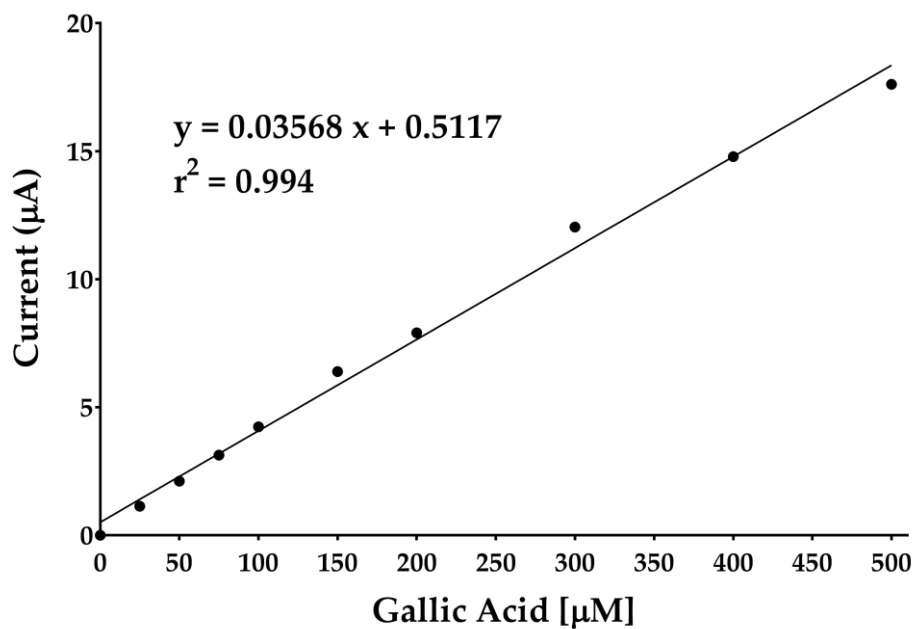

**Figure S1b.** Calibration curve, equation and regression coefficient relative to cyclic voltammograms in figure S1a

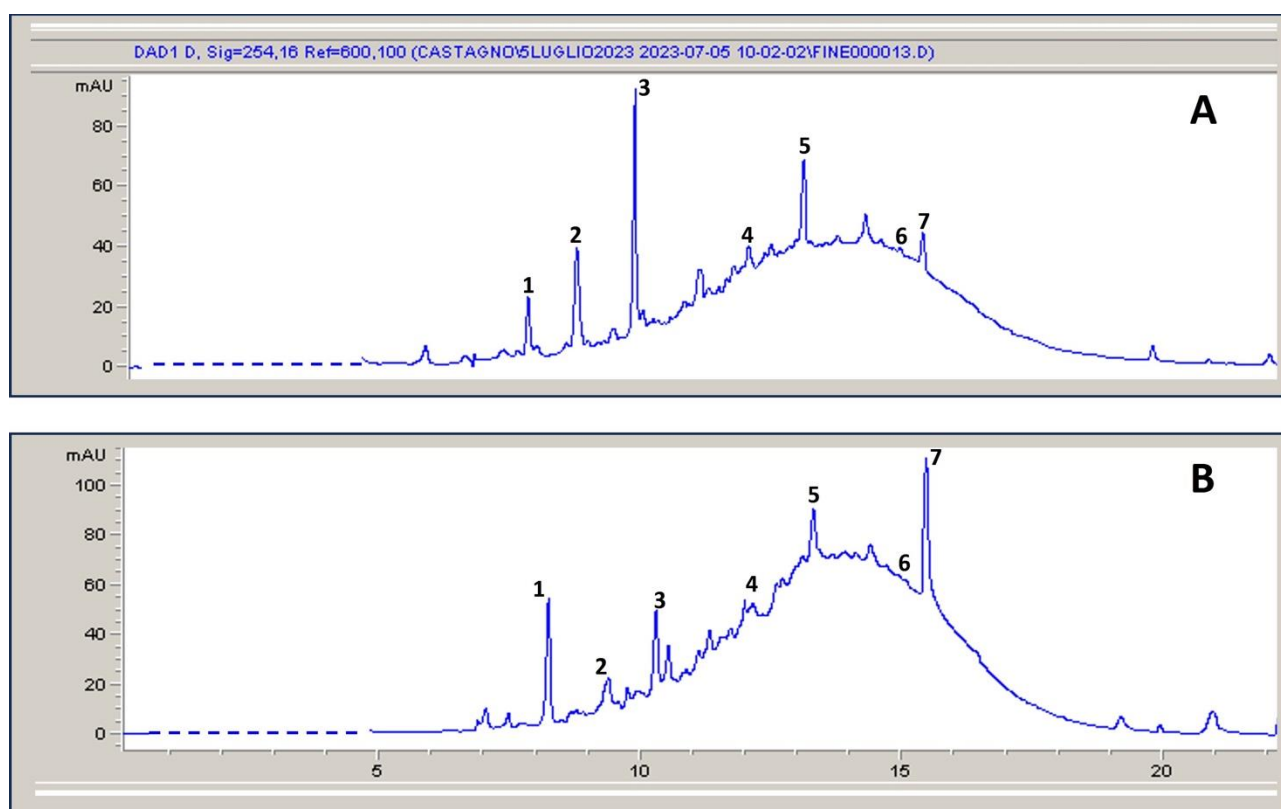

**Figure S2.** Chromatographic profile, acquired at 254 nm, of hot ILDP (A) and cold ILDP (B) extracts: **1** gallic acid, retention time ( $t_R$ ) 8.20 minutes; **2** vescalagin,  $t_R$  9.35 minutes; **3** castalagin,  $t_R$  10.30 minutes; **4** catechin,  $t_R$  12.10 minutes; **5** epicatechin,  $t_R$  13.30 minutes; **6** epicatechin gallate,  $t_R$  15.18 minutes; **7** ellagic acid,  $t_R$  15.70 minutes.
